# Supplementary material for: tBCPMA: a new trifunctional acrylic monomer for convenient synthesis of a well-defined amphiphilic graft copolymer by successive RDRP
Source: Royal Society of Chemistry journal article supplement (doi:10.1039/c4py00772g), 2014-06-30
Supplement: c4py00772g1.pdf [file c4py00772g1.pdf]

**Supporting Information For**  
**“*t*BCPMA: A New Trifunctional Acrylic Monomer**  
**for Convenient Synthesis of Well-Defined**  
**Amphiphilic Graft Copolymer by Successive RDRP”**

*Chun Feng,<sup>1</sup> Guolin Lu,<sup>1</sup> Gang Sun,<sup>2,\*</sup> Xunwei Liu,<sup>2</sup> Xiaoyu Huang<sup>1,\*</sup>*

<sup>1</sup> Laboratory of Synthetic and Self-Assembly Chemistry for Organic Functional Molecules, Shanghai Institute of Organic Chemistry, Chinese Academy of Sciences, 345 Lingling Road, Shanghai 200032, P. R. China

<sup>2</sup> Department of Medical Imaging, Jinan Military General Hospital, 25 Shifan Road, Jinan 250031, P. R. China

\* To whom correspondence should be addressed, E-mail: xyhuang@mail.sioc.ac.cn  
(Tel: +86-21-54925310, Fax: +86-21-64166128), cjr.sungang@vip.163.com (Tel:  
+86-531-51666277, Fax: +86-531-51666277)

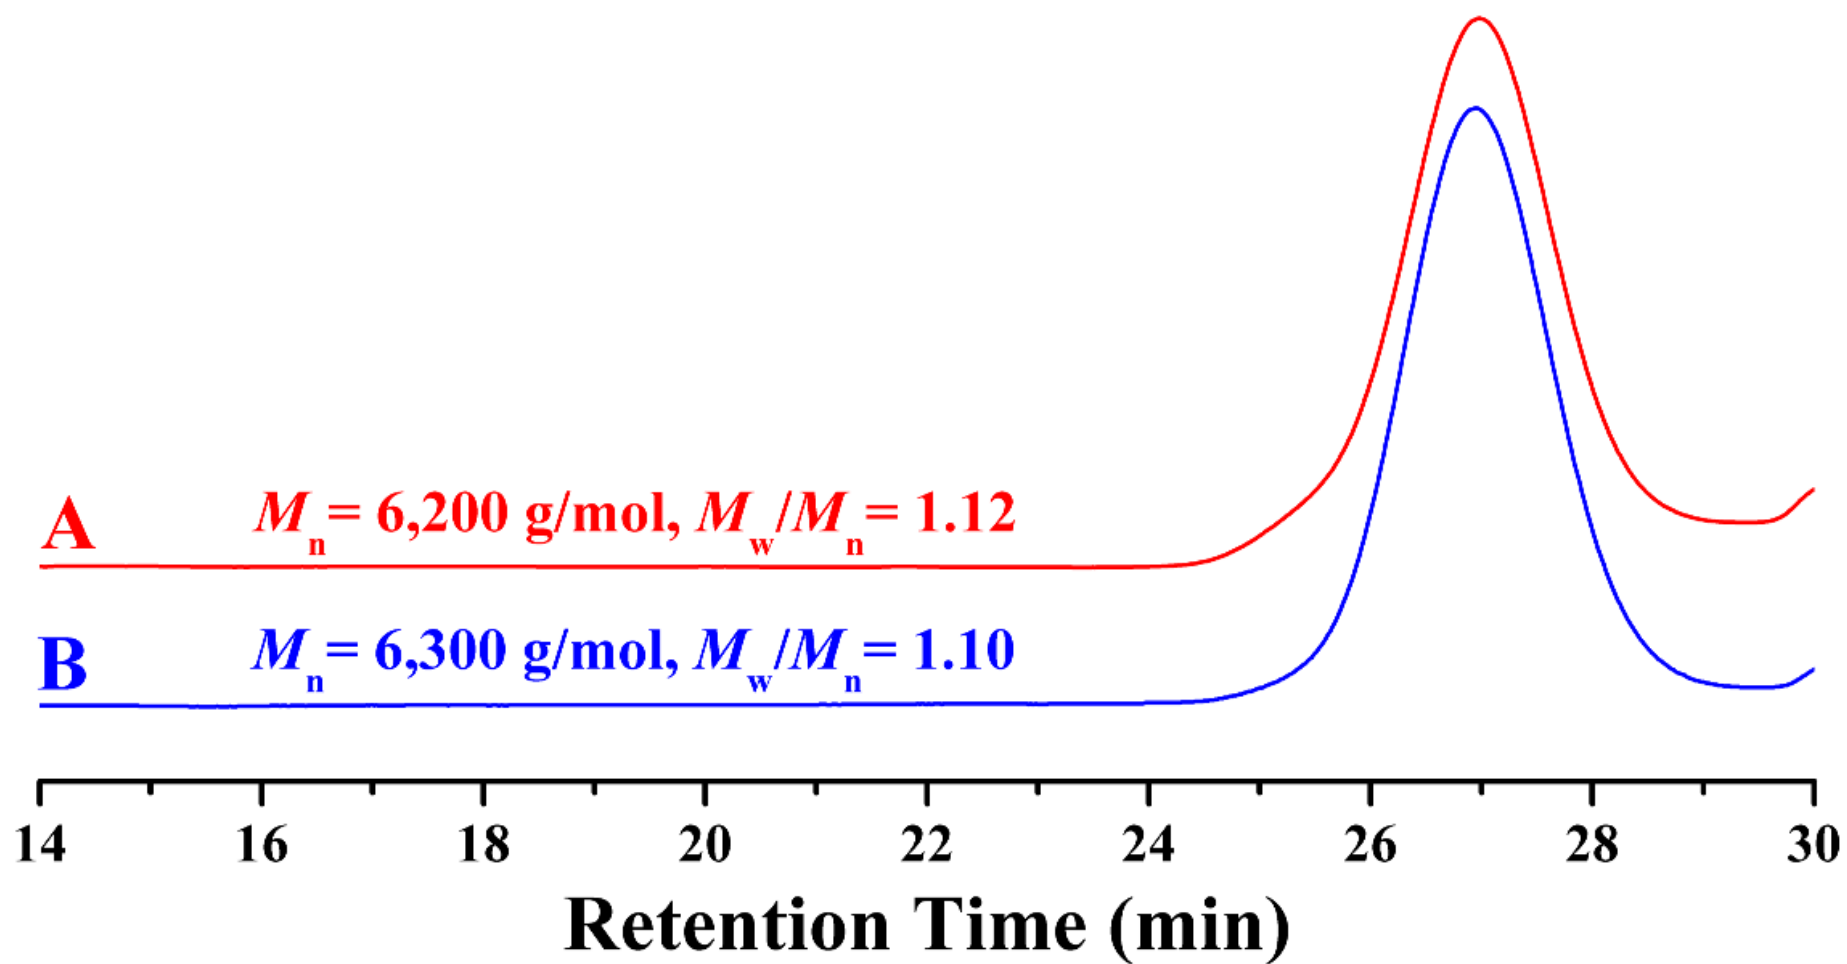

**Figure S1.** GPC curves of PtBCPMA **2** homopolymer before (A) and after (B) the removal of dithiobenzoate moiety in THF.

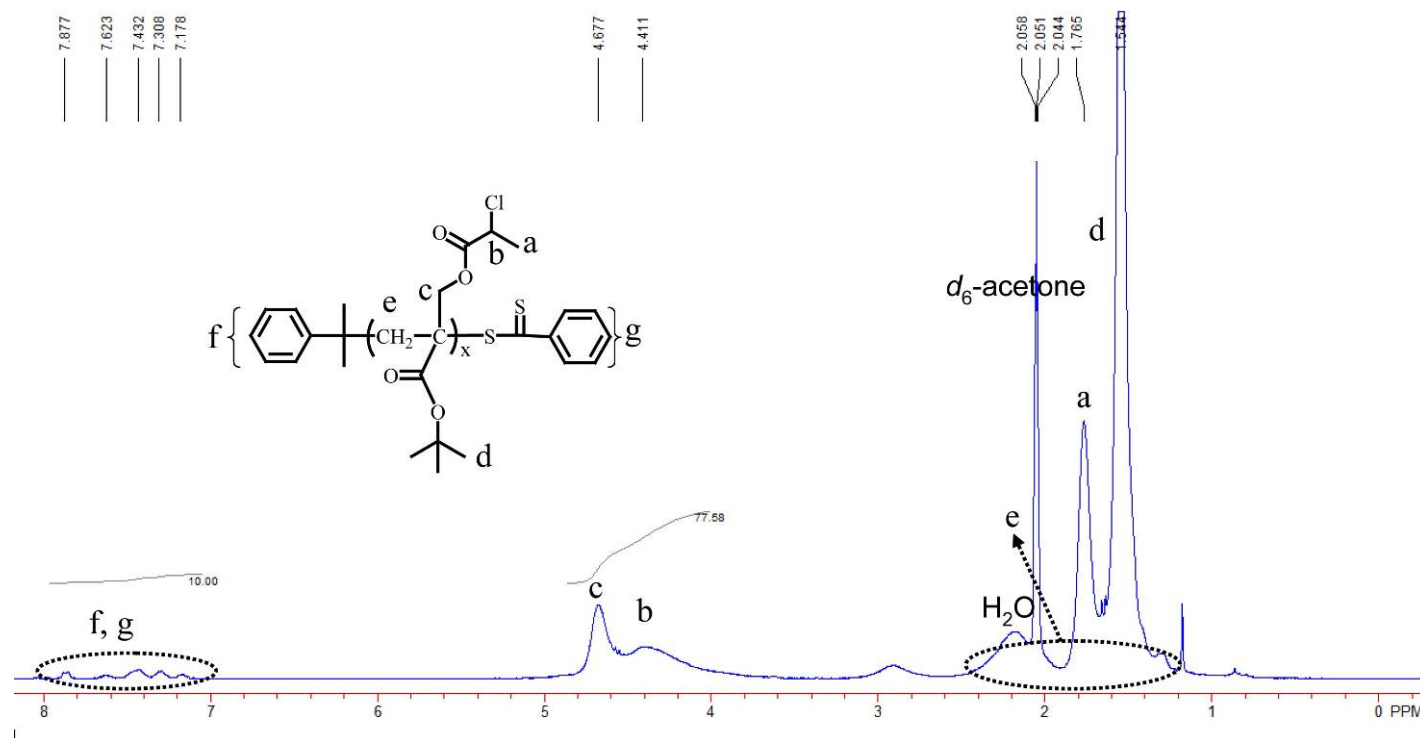

**Figure S2.** <sup>1</sup>H NMR spectrum of PtBCPMA **2** homopolymer before the removal of dithiobenzoate moiety in acetone-*d*<sub>6</sub>.

Note: <sup>1</sup>H NMR was employed to estimate the molecular weight of the obtained homopolymer as shown in Figure S2. The number of repeated unit of *t*BCPMA could be evaluated from the ratio of integral area of peaks of “f” and “g” to peaks of “b” and “c”. The number of repeated unit of *t*BCPMA evaluated from <sup>1</sup>H NMR was 25.8 ( $= [S_{(b+c)}/3]/[S_{(f+g)}/10]$ ,  $S_{(b+c)}$  and  $S_{(f+g)}$  are the integral area of peaks of “b” and “c”, and peaks of “f” and “g”, respectively).

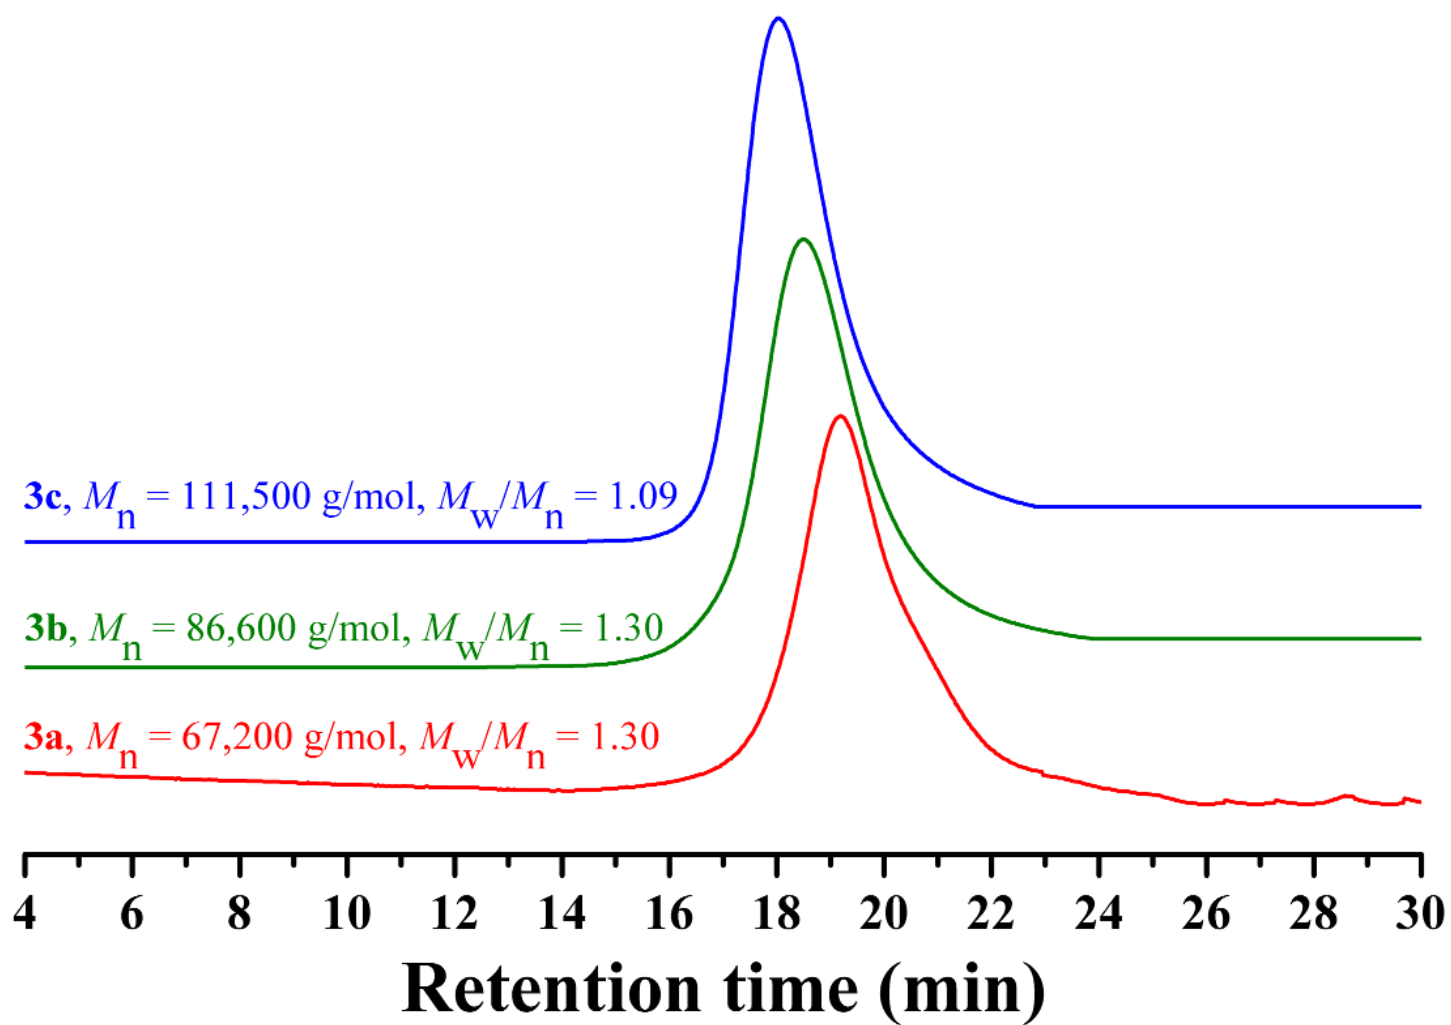

**Figure S3.** GPC/MALS curves of PtBA-g-PNIPAM **3** graft copolymers in LiBr-added DMF ([LiBr] = 15 mM).

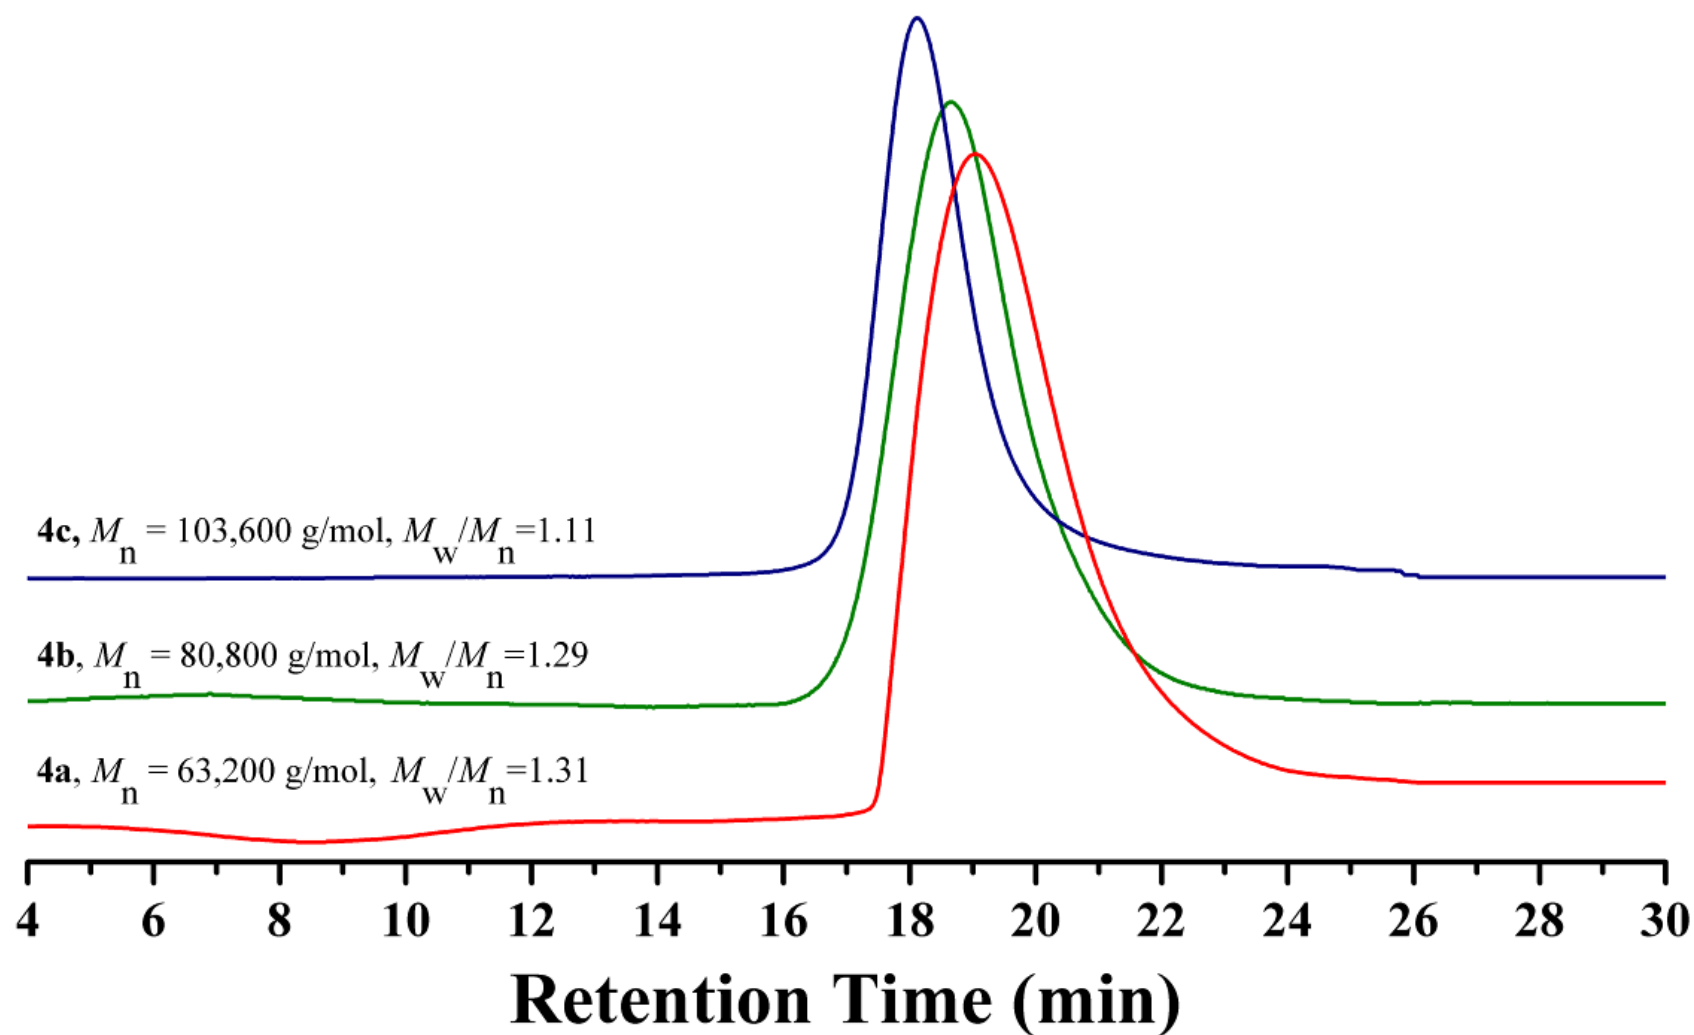

**Figure S4.** GPC curves of PAA-g-PNIPAM **4** graft copolymers in LiBr-added DMF ([LiBr] = 15 mM).

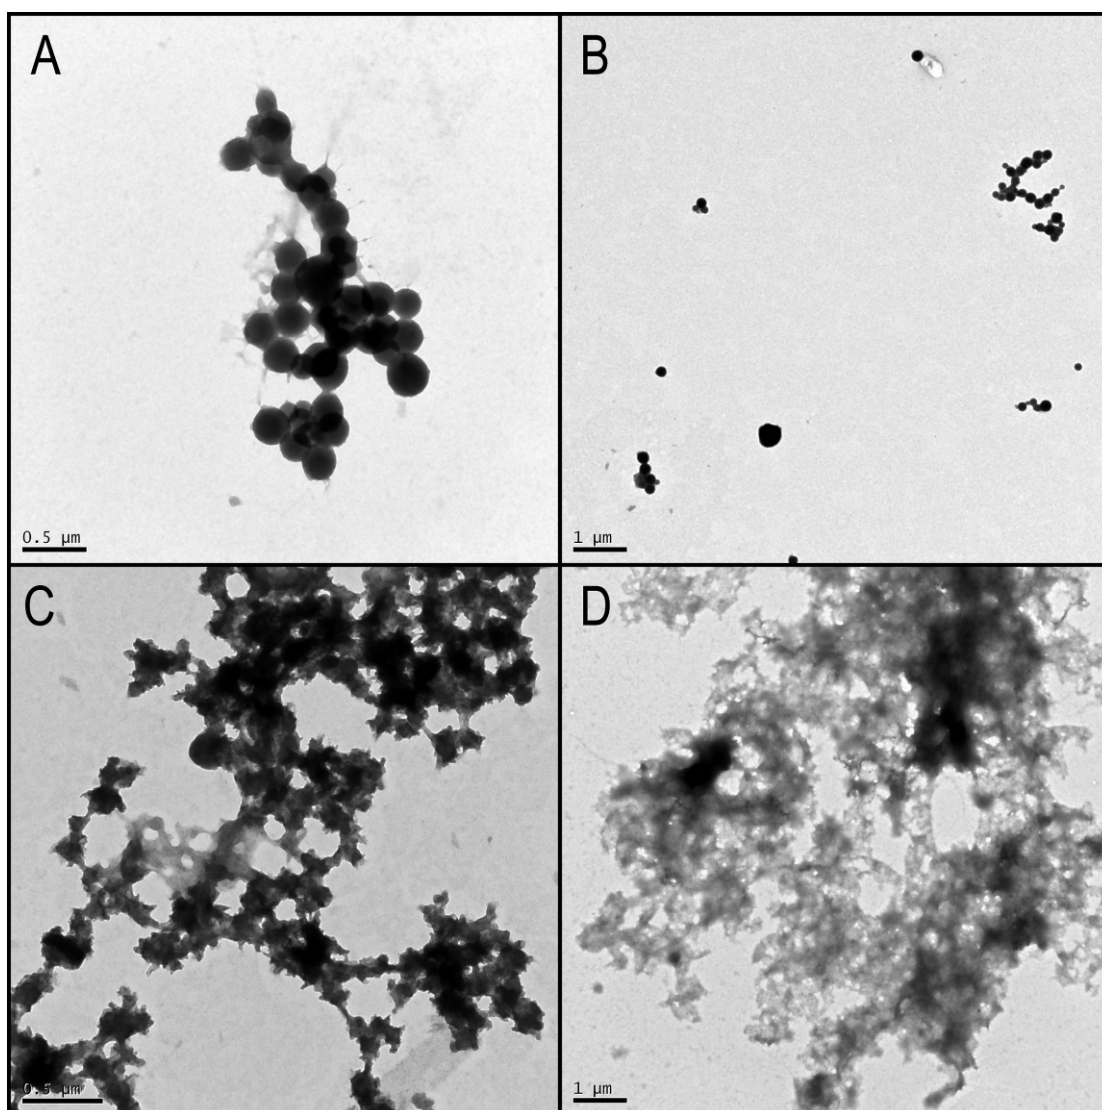

**Figure S5.** TEM images of PtBA-g-PNIPAM **3b** (A) and **3c** (B) at 25°C (below LCST of PNIPAM); PtBA-g-PNIPAM **3a** (C) and PAA-g-PNIPAM **4a** (D) at 36°C (above LCST of PNIPAM).
